# Supplementary material
Source: MDPI journal article supplement (https://www.mdpi.com/2306-5338/10/4/97)
Supplement: s1 [file s1]

## SUPPLEMENTAL MATERIALS

**Table S1.** Dendrometry attributes applied for the characterization of the forest structure.

| Dendrometric Attributes                           | Method                                                                                                                                        |
|---------------------------------------------------|-----------------------------------------------------------------------------------------------------------------------------------------------|
| Tree height [ $H_t$ , m]                          | * Estimated by clinometer.                                                                                                                    |
| Stem length [ $h_f$ , m]                          | * Estimated by clinometer.                                                                                                                    |
| Crown height [ $h_c$ , m]                         | $hc = Ht - hf$                                                                                                                                |
| Crown diameter, larger [D, m] and lower [d, m]    | Based on measurement of 2 diameters: in the North-South and East-West direction by a measuring tape.                                          |
| Crown projection Area [CA, m <sup>2</sup> ].      | $CA = \frac{D \cdot d \cdot \pi}{4}$                                                                                                          |
| Crown volume [V <sub>c</sub> , m <sup>3</sup> ]   | $Vc = \frac{4}{3 \times 8} \pi D \cdot d \cdot hc$                                                                                            |
| Diameter at breast height [D, cm].                | $DBH = \frac{CBH}{\pi}$<br><br>$CBH$ = circumference at breast at 1.30 m above soil ground level, measured by a tape (cm).                    |
| Basal Area [BA, m <sup>2</sup> ha <sup>-1</sup> ] | $BA = \frac{\pi \cdot DBH^2}{40000}$                                                                                                          |
| Density of trees [ind ha <sup>-1</sup> ]          | The density of forest trees was obtained by counting all forest trees with (DBH) $\geq 10$ cm in each plot and than extrapolated per hectare. |

**Table S2.** Families and forest species observed at unlogged (UL) and logged (L) plots at Jamari National Forest, Rondônia, Brazil. P1/P2/P3 – plots at unlogged forest; P4/P5/P6 – plots at logged forest.

| Family<br>Specie                             | Popular name          | Local | PLOTS |    |    |    |    |    | Total     |
|----------------------------------------------|-----------------------|-------|-------|----|----|----|----|----|-----------|
|                                              |                       |       | P1    | P2 | P3 | P4 | P5 | P6 |           |
| <b>ANACARDIACEAE</b>                         |                       |       |       |    |    |    |    |    | <b>2</b>  |
| <i>Astronium lecointei</i> Ducke             | Muiracatiara          | UF/LF | 1     |    |    |    |    | 1  | 2         |
| <b>ANNONACEAE</b>                            |                       |       |       |    |    |    |    |    | <b>12</b> |
| <i>Duguetia lanceolata</i>                   | Pindaíba              | UF/LF | 2     |    |    | 1  | 2  |    | 5         |
| <i>Guatteria australis</i> A.St.-Hil.        | Pindaíba Preta        | UF    | 1     | 3  |    |    |    |    | 4         |
| <i>Xylopia</i> sp                            | Envira, Envira branca | UF/LF | 1     | 1  |    |    |    | 1  | 3         |
| <b>APOCYNACEAE</b>                           |                       |       |       |    |    |    |    |    | <b>1</b>  |
| <i>Aspidosperma macrocarpon</i> Mart.        | Guarantã              | LF    |       |    |    |    |    | 1  | 1         |
| <b>ARECACEAE</b>                             |                       |       |       |    |    |    |    |    | <b>69</b> |
| <i>Euterpe precatoria</i> Mart.              | Açaí                  | UF/LF | 1     |    |    | 1  |    | 1  | 3         |
| <i>Oenocarpus bacaba</i> Mart.               | Bacaba                | LF    |       |    |    | 1  |    |    | 1         |
| <i>Orbignya speciosa</i> (Mart.) Barb. Rodr. | Babaçu                | UF/LF | 11    | 7  | 6  | 17 | 11 | 12 | 64        |
| <i>Socratea exorrhiza</i>                    | Paxiuba               | LF    |       |    |    |    | 1  |    | 1         |



|                                                   |                       |       |    |   |   |   |   |   |  |           |
|---------------------------------------------------|-----------------------|-------|----|---|---|---|---|---|--|-----------|
| <b>LECYTHIDACEAE</b>                              |                       |       |    |   |   |   |   |   |  | <b>7</b>  |
| <i>Bertholletia excelsa</i> H.B.K.                | Castanheira           | UF/LF | 1  |   | 1 |   |   |   |  | 2         |
| <i>Eschweilera coriacea</i> (DC.)                 | Matamatá              | UF/LF |    |   | 1 | 1 | 1 | 2 |  | 5         |
| <b>LEGUMINOSAE</b>                                |                       |       |    |   |   |   |   |   |  | <b>4</b>  |
| <i>Dinizia excelsa</i> Ducke                      | Faveira Ferro         | UF/LF | 1  | 2 |   |   |   |   |  | 3         |
| <i>Inga Vera</i>                                  | Ingazeiro             | LF    |    |   |   |   |   | 1 |  | 1         |
| <b>MALVACEAE</b>                                  |                       |       |    |   |   |   |   |   |  | <b>4</b>  |
| <i>Luehea divaricata</i>                          | Açoita cavalo         | LF    |    |   |   |   |   | 1 |  | 1         |
| <i>Sterculia striata</i> St. Hil. et Naudin       | Xixá Bolão            | UF/LF |    | 1 | 1 |   | 1 |   |  | 3         |
| <b>MELIACEAE</b>                                  |                       |       |    |   |   |   |   |   |  | <b>11</b> |
| <i>Guarea</i> sp.                                 | Jitó                  | UF/LF | 2  | 2 | 1 | 1 | 1 | 1 |  | 8         |
| <i>Trichillia</i> sp.                             | Murici                | UF/LF | 1  |   |   | 2 |   |   |  | 3         |
| <b>MIMOSACEAE</b>                                 |                       |       |    |   |   |   |   |   |  | <b>4</b>  |
| <i>Parkia pendula</i> Benth. ex. Walp.            | Angelin Saia          | UF    | 1  |   |   |   |   |   |  | 1         |
| <i>Parkia</i> sp.                                 | Fava branca           |       |    |   |   |   | 1 | 1 |  | 2         |
| <i>Stryphnodendron Guianensis</i> (Aubl.) Benth.  | Baginha               | UF    |    | 1 |   |   |   |   |  | 1         |
| <b>MORACEAE</b>                                   |                       |       |    |   |   |   |   |   |  | <b>54</b> |
| <i>Brosimum rubescens</i> Taub                    | Amapá                 | LF    |    |   |   |   | 1 |   |  | 1         |
| <i>Castilla ulei</i> Warburg.                     | Caucho                | LF    | 1  |   |   |   | 1 |   |  | 2         |
| <i>Pseudolmedia laevis</i> (R.& P) Macabr.        | Pama Cegador          | UF/LF | 17 | 8 | 9 | 3 | 5 | 9 |  | 51        |
| <b>MYRISTICACEAE</b>                              |                       |       |    |   |   |   |   |   |  | <b>16</b> |
| <i>Iryanthera tricomis</i>                        | Ucuúba-sangue         | UF/LF | 2  | 1 |   |   | 1 | 3 |  | 7         |
| <i>Virola surinamensis</i> (Rol. ex Rottb.) Warb. | Ucuúba D'água, Virola | UF/LF | 3  | 1 | 2 | 1 | 2 |   |  | 9         |
| <b>OLACACEAE</b>                                  |                       |       |    |   |   |   |   |   |  | <b>1</b>  |
| <i>Minquartia guianensis</i> Aubl.                | Acariquara            | LF    |    |   |   |   | 1 |   |  | 1         |
| <b>RUBIACEAE</b>                                  |                       |       |    |   |   |   |   |   |  | <b>3</b>  |
| <i>Balizia</i> sp.                                | Escorrega Macaco      | UF    | 2  |   |   |   |   |   |  | 2         |
| <i>Duroia macrophylla</i> Huber                   | Sanguinho             | UF    |    |   |   | 1 |   |   |  | 1         |
| <b>RUTACEAE</b>                                   |                       |       |    |   |   |   |   |   |  | <b>1</b>  |
| <i>Zanthoxylum rhoifolium</i> Lam                 | Mamica de porca       | LF    |    |   |   |   |   | 1 |  | 1         |
| <b>SAPOTACEAE</b>                                 |                       |       |    |   |   |   |   |   |  | <b>17</b> |
| <i>Manilkara huberi</i>                           | Maçaranduba           | UF    |    |   |   |   | 1 |   |  | 1         |
| <i>Pouteria torta</i> (Mart.) Radlk.              | Abiorana              | UF/LF | 3  | 3 | 5 |   | 4 | 1 |  | 16        |
| <b>STERCULIACEAE</b>                              |                       |       |    |   |   |   |   |   |  | <b>6</b>  |
| <i>Sterculia pruriens</i> (Aubl.) K. Schum.       | Xixá                  | UF    | 1  | 1 |   |   |   |   |  | 2         |
| <i>Theobroma</i> sp.                              | Cupuí                 | UF/LF | 1  |   | 1 |   |   | 1 |  | 3         |
| <i>Theobroma sylvestris</i> Mart.                 | Cacaúí                | UF    |    |   | 1 |   |   |   |  | 1         |
| <b>TILIACEAE</b>                                  |                       |       |    |   |   |   |   |   |  | <b>4</b>  |
| <i>Apeiba echinata</i> Gaertn.                    | Pente de Macaco       | UF/LF |    |   | 1 | 1 | 1 | 1 |  | 4         |
| <b>ULMACEAE</b>                                   |                       |       |    |   |   |   |   |   |  | <b>1</b>  |
| <i>Ampelocera ruizii</i> Kuhlman                  | Cinzeiro              | LF    |    |   |   |   | 1 |   |  | 1         |
| <b>URTICACEAE</b>                                 |                       |       |    |   |   |   |   |   |  | <b>2</b>  |
| <i>Pourouma guianensis</i> Aubl.                  | Embaúbarana           | UF/LF | 1  |   |   |   | 1 |   |  | 2         |
| <b>VERBENACEAE</b>                                |                       |       |    |   |   |   |   |   |  | <b>2</b>  |

|                                 |                 |       |    |    |    |    |    |    |           |
|---------------------------------|-----------------|-------|----|----|----|----|----|----|-----------|
| <i>Lantana camara</i> L.        | Cambará         | UF    | 1  | 1  |    |    |    |    | 2         |
| <b>VOCHYSIACEAE</b>             |                 |       |    |    |    |    |    |    | <b>6</b>  |
| <i>Erisma uncinatum</i> Warm    | Cambará Rosa    | UF    |    | 2  | 1  |    |    |    | 3         |
| <i>Qualea paraense</i> Ducke    | Mandioqueiro    | LF    |    |    |    |    | 1  |    | 1         |
| <i>Qualea tesmannii</i> Milldr. | Catuaba amarela | UF/LF |    |    | 1  |    | 1  |    | 2         |
| <b>I - Unknown</b>              |                 |       |    |    |    |    |    |    | <b>21</b> |
| I_1                             | Unknown         | UF    | 1  |    |    |    |    |    | 1         |
| I_2                             | Unknown         | UF    | 1  |    |    |    |    |    | 1         |
| I_3                             | Unknown         | UF    | 1  |    |    |    |    |    | 1         |
| I_4                             | Unknown         | UF    | 1  |    |    |    |    |    | 1         |
| I_5                             | Unknown         | UF    | 1  |    |    |    |    |    | 1         |
| I_6                             | Unknown         | UF    |    | 1  |    |    |    |    | 1         |
| I_7                             | Unknown         | UF    |    | 1  |    |    |    |    | 1         |
| I_8                             | Unknown         | UF    |    | 1  |    |    |    |    | 1         |
| I_9                             | Unknown         | UF    |    |    | 1  |    |    |    | 1         |
| I_10                            | Unknown         | UF    |    |    | 1  |    |    |    | 1         |
| I_11                            | Unknown         | UF    |    |    | 1  |    |    |    | 1         |
| I_12                            | Unknown         | LF    |    |    |    | 1  |    |    | 1         |
| I_13                            | Unknown         | LF    |    |    |    | 1  |    |    | 1         |
| I_14                            | Unknown         | LF    |    |    |    |    | 1  |    | 1         |
| I_15                            | Unknown         | LF    |    |    |    |    | 1  |    | 1         |
| I_16                            | Unknown         | LF    |    |    |    |    |    | 1  | 1         |
| I_17                            | Unknown         | LF    |    |    |    |    |    | 1  | 1         |
| I_18                            | Unknown         | LF    |    |    |    |    |    | 1  | 1         |
| I_19                            | Unknown         | LF    |    |    |    |    |    | 1  | 1         |
| I_20                            | Unknown         | LF    |    |    |    |    |    | 1  | 1         |
| I_21                            | Unknown         | LF    |    |    |    |    |    | 1  | 1         |
| <b>Total</b>                    |                 |       | 74 | 59 | 63 | 56 | 59 | 58 | 369       |

**Table S3.** Statistical analyses for open rainfall and net precipitation in the Unlogged (UL) and Logged (L) at Jamari National Forest, Rondônia, Brazil.

| Values  | Open rainfall |        | Net precipitation |        |
|---------|---------------|--------|-------------------|--------|
|         | [mm]          |        |                   |        |
|         | UN            | L      | UN                | L      |
| Min     | 0             | 0      | 0                 | 0      |
| Max     | 324.8         | 267.5  | 278.8             | 243.2  |
| Mean    | 143.7         | 136.3  | 162.0             | 129.2  |
| SD (mm) | 110.1         | 102.7  | 95.1              | 90.3   |
| CV (%)  | 76.6          | 75.4   | 58.7              | 69.9   |
| Rainy   | 1689.2        | 1618.5 | 1797.9            | 1508.8 |
| Dry     | 179.0         | 152.9  | 308.4             | 170.2  |
| Total   | 1868.2        | 1771.3 | 2106.3            | 1679.0 |

**Table S4.** Litter fractions descriptive analyses for unlogged (UL) and logged (L) at Jamari National Forest, Rondônia, Brazil.

| Months | Litter Fractions [t ha <sup>-1</sup> ] |       |        |       |                            |       |       |       | Total litter<br>[t ha <sup>-1</sup> ] |      |
|--------|----------------------------------------|-------|--------|-------|----------------------------|-------|-------|-------|---------------------------------------|------|
|        | Branches                               |       | Leaves |       | Unstrutecture<br>materials |       | Seeds |       |                                       |      |
|        | UF                                     | LF    | UF     | LF    | UF                         | LF    | UF    | LF    | UF                                    | LF   |
| oct-19 | 4.38                                   | 4.64  | 5.49   | 6.63  | 2.06                       | 1.99  | 0.27  | 0.06  | 12.2                                  | 13.3 |
| nov-19 | 4.42                                   | 3.82  | 3.54   | 3.90  | 1.97                       | 3.50  | 0.43  | 0.09  | 10.4                                  | 11.3 |
| dec-19 | 3.63                                   | 2.12  | 1.32   | 1.80  | 2.57                       | 1.88  | 0.25  | 0.07  | 7.8                                   | 5.9  |
| jan-20 | 4.19                                   | 3.22  | 1.79   | 3.20  | 2.22                       | 1.57  | 0.15  | 0.53  | 8.3                                   | 8.5  |
| feb-20 | 4.43                                   | 2.96  | 2.04   | 1.70  | 2.24                       | 1.59  | 0.28  | 0.30  | 9.0                                   | 6.6  |
| mar-20 | 4.15                                   | 4.44  | 1.14   | 1.59  | 2.00                       | 1.36  | 0.09  | 0.56  | 7.4                                   | 8.0  |
| apr-20 | 2.35                                   | 2.58  | 0.75   | 1.25  | 1.42                       | 0.96  | 0.13  | 0.10  | 4.6                                   | 4.9  |
| may-20 | 1.65                                   | 2.01  | 1.04   | 1.49  | 0.95                       | 1.53  | 0.12  | 0.24  | 3.8                                   | 5.3  |
| jun-20 | 2.40                                   | 1.79  | 1.66   | 2.64  | 0.98                       | 1.50  | 0.93  | 0.02  | 6.0                                   | 5.9  |
| jul-20 | 2.69                                   | 4.10  | 3.91   | 3.70  | 0.89                       | 0.86  | 0.00  | 0.00  | 7.5                                   | 8.7  |
| aug-20 | 1.66                                   | 1.72  | 4.36   | 3.79  | 0.33                       | 0.36  | 0.02  | 0.00  | 6.4                                   | 5.9  |
| sep-20 | 1.99                                   | 1.75  | 3.50   | 3.19  | 0.73                       | 0.74  | 0.00  | 0.18  | 6.2                                   | 5.9  |
| oct-20 | 2.32                                   | 2.61  | 3.08   | 2.53  | 1.31                       | 1.58  | 0.18  | 0.00  | 6.9                                   | 6.7  |
| Total  | 40.26                                  | 37.76 | 33.62  | 37.41 | 19.67                      | 19.42 | 2.85  | 2.15  | 96.4                                  | 96.7 |
| Min    | 0.75                                   | 1.25  | 1.65   | 1.72  | 0.33                       | 0.36  | 0.00  | 0.00  | 3.8                                   | 4.9  |
| Max    | 5.49                                   | 6.63  | 4.43   | 4.64  | 2.57                       | 3.50  | 0.93  | 0.56  | 12.2                                  | 13.3 |
| Mean   | 2.59                                   | 2.88  | 3.10   | 2.90  | 1.51                       | 1.49  | 0.22  | 0.17  | 7.4                                   | 7.4  |
| SD     | 1.49                                   | 1.47  | 1.12   | 1.05  | 0.70                       | 0.76  | 0.25  | 0.19  | 2.3                                   | 2.5  |
| Cv (%) | 57.5                                   | 50.9  | 36.0   | 36.3  | 46.5                       | 51.1  | 112.8 | 116.6 | 30.4                                  | 33.5 |
| Rainy  | 6.3                                    | 6.0   | 5.4    | 5.4   | 3.4                        | 3.4   | 0.4   | 0.2   | 15.4                                  | 15.1 |
| Dry    | 2.2                                    | 2.3   | 3.4    | 3.3   | 0.7                        | 0.9   | 0.2   | 0.1   | 6.5                                   | 6.6  |

**Table S5.** Effective litter water holding capacity [EWC, %], water holding capacity [WHC, %], litter effective water-retention capacity [ $W_{\text{eff}}$ , t ha<sup>-1</sup>], maximum retention capacity [ $W_{\text{max}}$ , t ha<sup>-1</sup>] and water content [WC, g<sub>water</sub> kg<sub>litter</sub><sup>-1</sup>] for unlogged (UL) and logged (L) at Jamari National Forest, Rondônia, Brazil.

| Month  | EWC  |      | WHC   |       | $W_{\text{eff}}$      |      | $W_{\text{max}}$      |      | WC                                                       |     |
|--------|------|------|-------|-------|-----------------------|------|-----------------------|------|----------------------------------------------------------|-----|
|        | [%]  |      | [%]   |       | [t ha <sup>-1</sup> ] |      | [t ha <sup>-1</sup> ] |      | [g <sub>water</sub> kg <sub>litter</sub> <sup>-1</sup> ] |     |
|        | UF   | LF   | UF    | LF    | UF                    | LF   | UF                    | LF   | UF                                                       | LF  |
| Oct-19 | 41.8 | 37.9 | 208.7 | 172.1 | 16.5                  | 14.4 | 25.5                  | 22.9 | 418                                                      | 379 |
| Nov-19 | 52.1 | 47.0 | 248.4 | 254.2 | 16.5                  | 19.1 | 25.7                  | 28.7 | 521                                                      | 470 |
| Dec-19 | 48.7 | 47.8 | 253.6 | 284.4 | 13.0                  | 11.4 | 19.7                  | 16.7 | 487                                                      | 478 |
| Jan-20 | 56.8 | 62.4 | 267.4 | 280.5 | 14.2                  | 15.0 | 22.3                  | 23.9 | 568                                                      | 624 |
| Feb-20 | 63.2 | 69.6 | 243.3 | 332.2 | 12.9                  | 13.9 | 21.9                  | 21.8 | 632                                                      | 696 |
| Mar-20 | 60.1 | 54.9 | 257.6 | 226.4 | 11.7                  | 10.9 | 19.0                  | 18.0 | 601                                                      | 549 |
| Apr-20 | 63.4 | 62.4 | 270.5 | 266.6 | 7.7                   | 8.0  | 12.6                  | 13.0 | 634                                                      | 624 |

|              |      |      |       |       |      |      |      |      |     |     |
|--------------|------|------|-------|-------|------|------|------|------|-----|-----|
| May-20       | 46.9 | 45.8 | 258.5 | 225.8 | 6.5  | 7.7  | 9.7  | 11.9 | 469 | 458 |
| Jun-20       | 37.3 | 45.1 | 170.9 | 217.5 | 6.4  | 8.3  | 10.2 | 12.9 | 373 | 451 |
| Jul-20       | 16.2 | 17.6 | 162.6 | 146.2 | 9.1  | 9.2  | 12.2 | 12.7 | 162 | 176 |
| Aug-20       | 17.6 | 23.1 | 153.0 | 140.4 | 7.2  | 5.6  | 9.8  | 8.2  | 176 | 231 |
| Sep-20       | 40.7 | 40.7 | 183.7 | 160.2 | 7.2  | 5.6  | 11.4 | 9.4  | 407 | 407 |
| Oct-20       | 40.0 | 49.0 | 187.4 | 207.4 | 8.2  | 8.5  | 12.9 | 13.9 | 400 | 490 |
| <b>Mean</b>  | 48.7 | 49.3 | 220.8 | 221.3 | 10.3 | 10.3 | 16.3 | 16.7 | 450 | 464 |
| <b>SD</b>    | 61.8 | 54.2 | 43.7  | 58.7  | 3.7  | 4.0  | 1.0  | 1.5  | 153 | 147 |
| <b>Rainy</b> | 53.8 | 54.1 | 239.7 | 244.1 | 12.5 | 12.5 | 20.1 | 20.6 | 533 | 539 |
| <b>Dry</b>   | 31.9 | 35.0 | 178.7 | 174.4 | 7.2  | 7.2  | 11.1 | 11.2 | 317 | 345 |
